# Supplementary material
Source: PubMed Central journal article supplement (PMC4685710)
Supplement: NIHMS744117-supplement-Supplementary_Material.pdf [file NIHMS744117-supplement-Supplementary_Material.pdf]

**Supplementary material for <W. Wakeland et al.> <Dynamic model of nonmedical opioid use trajectories and potential policy interventions> <The American Journal of Drug and Alcohol Abuse> <2015>**

## **Supplemental Information**

### **Model Diagram and List of Equations and Parameters**

**[Note to t/s: Please position Supplementary Figures A and B here with their captions below them. Supplementary Figures A and B are in the Graphics folder within Zipfile]**

Supplementary Figure Part A. Lefthand part of the full stock and flow diagram for the computational model.

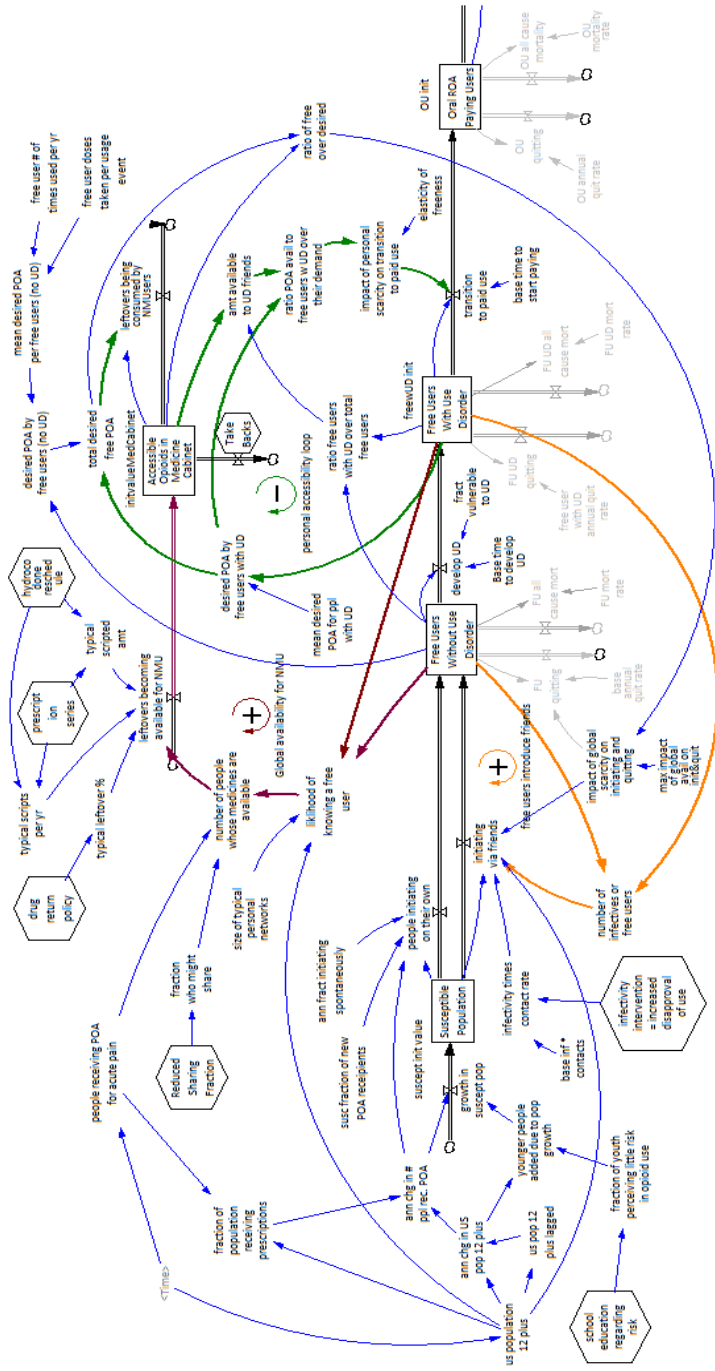

Supplementary Figure Part B: Righthand part of the full stock and flow diagram for the computational model

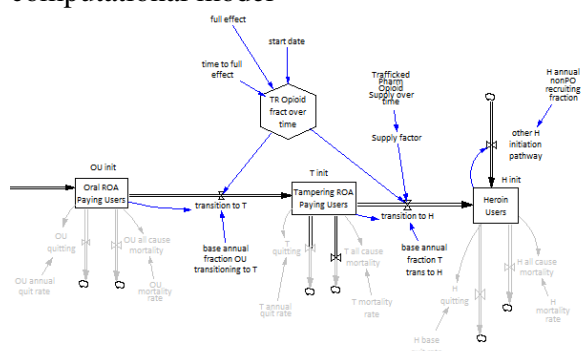

### Model equations and parameters in alphabetical order

Accessible Opioids in Medicine Cabinet = INTEG (leftovers becoming available for NMU-  
leftovers being consumed by NMUsers – TakeBacks, initvalueMedCabinet)

all users = Free Users Without Use Disorder+users w UD

amt available to UD friends = Accessible Opioids in Medicine Cabinet\*ratio free users with UD  
over total free users

“ann chg in # ppl rec. POA” = ann chg in US pop 12 plus\*fraction of population receiving  
prescriptions

ann chg in US pop 12 plus = us population 12 plus-us pop 12 plus lagged

ann fract initiating spontaneously = 0.003 [0.0005, 0.002]

base annual fraction OU transitioning to T = 0.3

base annual fraction T trans to H = 0.05 [1–2% prior to 2000, 3–5% 2000 and later from survival  
analysis of TEDS 1992–2012, KRAL 2013, NSDUH 2000–2012.

base annual quit rate = 0.15

"base inf \* contacts" = 6

Base time to develop UD = 5

base time to start paying = 2

"desired POA by free users (no UD)" = Free Users Without Use Disorder\*"mean desired POA per  
free users (no UD)"

desired POA by free users with UD = Free Users With Use Disorder\*mean desired POA for ppl  
with UD

develop UD = Free Users Without Use Disorder\*fract vulnerable to UD/Base time to develop UD

drug return policy = 1 - STEP(0.25, 2010.5 )

effectofpolydrugtrendondeaths = SMOOTH3I(1+RAMP(0.16, 2000, 2010), 1, 1)

elasticity of freeness = 0.5

fract vulnerable to UD = 0.2

fraction of population receiving prescriptions = people receiving POA for acute pain/us population  
12 plus

fraction of youth perceiving little risk in opioid use = 0.47\*school education regarding risk [from

MTF 2010, 2011, 2012: 12th graders perceiving risk of trying opioids as moderate, low, or no risk.  
.45%, 48%, 47%

fraction who might share = 0.35\*Reduced Sharing Fraction [36% of 483 college students have diverted their prescription drugs in their lifetime; 35.1% had diverted opioid anagesics (McCabe et al, 2011)]

free UD OD mortality = 0.001

Free UD ODs = free UD OD mortality\*Free Users With Use

Disorder\*effectofpolydrugtrendondeaths

"free user # of times used per yr" = 20 [NSDUH Analytic Series A-28 (2002–2004), Tables 2.18B, pg. 201 shows # of days used/yr]

free user doses taken per usage event = 1.5 [1 to 5 per Katz 2010; 2 or 3 seems plausible; with 2 being more likely; prev. Expert panel endorsed 2 as well]

free user with UD annual quit rate = 0.2 [less than .25 for UD and paying]

Free Users With Use Disorder = INTEG (develop UD-FU UD all cause mort - FU UD quitting-transition to paid use, freewUD init)

Free Users Without Use Disorder = INTEG (initiating via friends+people initiating on their own-develop UD - FU all cause mort - FU quitting, 4.08e+006)

freewUD init = 300000 [per NSDUH 1995, Passik et al 2006]

FU all cause mort = Free Users Without Use Disorder\*FU mort rate

FU mort rate = 0.0084

FU quitting = (Free Users Without Use Disorder\*base annual quit rate)\*impact of global scarcity on initiating and quitting

FU UD all cause mort = Free Users With Use Disorder\*FU UD mort rate

FU UD mort rate = 0.01 [a bit less than those paying]

FU UD quitting = Free Users With Use Disorder\*free user with UD annual quit rate

full effect = 0.7\*0 [\*0 means policy is not active for baseline]

growth in suscept pop = "ann chg in # ppl rec. POA"+younger people added due to pop growth

H all cause mortality = H mortality rate\*Heroin Users

H annual nonPO recruiting fraction = 0.02

H base quit rate = 0.05 [low fraction is consistent with long-term nature of H addiction]

H init = 1.351e+006

H mortality rate = 0.012

H ODs = Heroin Users\*OD mortality H

H quitting = Heroin Users\*H base quit rate

Heroin Users = INTEG (other H initiation pathway + transition to H-H all cause mortality - H quitting, H init)

hydrocodone reschedule = 1 [meaning potential policy not active at baseline]

impact of global scarcity on initiating and quitting = "max impact of global avail on init&quit" + 1/ratio of free over desired

impact of personal scarcity on transition to paid use = elasticity of freeness\*(1+1/ratio POA avail to free users w UD over their demand)

"infectivity intervention = increased disapproval of use" = 1 - STEP( 0.25 , 2005)\*0 [\*0 means not for baseline]

infectivity times contact rate = "base inf \* contacts"\*"infectivity intervention = increased disapproval of use"

initiating via friends = (infectivity times contact rate\*Susceptible Population\*number of infectives or free users / us population 12 plus)/impact of global scarcity on initiating and quitting

initvalueMedCabinet = 2.5e+009  
 leftovers becoming available for NMU = number of people whose medicines are available\*"typical leftover %"\*typical scripted amt \* typical scripts per yr  
 leftovers being consumed by NMUsers = MIN(Accessible Opioids in Medicine Cabinet,total desired free POA)  
 likelihood of knowing a free user = 1-EXP(-size of typical personal networks\*(Free Users With Use Disorder+Free Users Without Use Disorder) / us population 12 plus)  
 "max impact of global avail on init&quit" = 0.7  
 mean desired POA for ppl with UD = 200  
 "mean desired POA per free users (no UD)" = "free user # of times used per yr"\*free user doses taken per usage event  
 number of infectives or free users = Free Users Without Use Disorder+Free Users With Use Disorder  
 number of people whose medicines are available = people receiving POA for acute pain\*likelihood of knowing a free user\*fraction who might share  
 OD mortality H = 0.0015+RAMP(0.00014, 2001, 2009)  
 Oral ROA Paying Users = INTEG ((transition to paid use-OU all cause mortality-OU quitting-transition to T), OU init)  
 other H initiation pathway = Heroin Users\*H annual nonPO recruiting fraction  
 OU all cause mortality = Oral ROA Paying Users\*OU mortality rate  
 OU annual quit rate = 0.25  
 OU init = 180000  
 OU mortality rate = 0.01  
 OU OD mortality = 0.001  
 OU ODs = Oral ROA Paying Users\*OU OD mortality\*effectofpolydrugtrendondeaths  
 OU quitting = Oral ROA Paying Users\*OU annual quit rate  
 people initiating on their own = Susceptible Population\*ann fract initiating spontaneously+"ann chg in # ppl rec. POA" \* susc fraction of new POA recipients  
 percentage of inits are spont = people initiating on their own/tot initiating [RBP: NSDUH 3.1% in 2006, 3% in 2010 and 4.1% in 2012]  
 prescription series = 1 {meaning potential policy not active at baseline}  
 ratio free users with UD over total free users = Free Users With Use Disorder/(Free Users Without Use Disorder+Free Users With Use Disorder)  
 ratio of free over desired = Accessible Opioids in Medicine Cabinet/total desired free POA  
 ratio POA avail to free users w UD over their demand = amt available to UD friends/desired POA by free users with UD  
 rec user OD mortality = 0.0002  
 rec user ODs = Free Users Without Use Disorder\*rec user OD mortality\*effectofpolydrugtrendondeaths  
 sharing reduction policy = 1 - (STEP (0.25, 2005)\*1)\*0 [\*0 means policy not active for baseline]  
 size of typical personal networks = 30  
 start date = 2010.5 [for policy intervention]  
 Supply factor = SMOOTH3 (1/Trafficked Pharm Opioid Supply over time, 1, 0.3)  
 susc fraction of new POA recipients = 0.075  
 suscept init value = 7.5e+006  
 Susceptible Population = INTEG (growth in suscept pop-initiating via friends-people initiating on their own, suscept init value)

$T_{\text{all cause mortality}} = T_{\text{mortality rate}} * \text{Tampering ROA Paying Users}$   
 $T_{\text{annual quit rate}} = 0.1$   
 $T_{\text{init}} = 240000$   
 $T_{\text{mortality rate}} = 0.012$   
 $T_{\text{OD mortality}} = 0.0015$   
 $T_{\text{ODs}} = T_{\text{OD mortality}} * \text{Tampering ROA Paying Users} * \text{effect of polydrug trend on deaths}$   
 $T_{\text{quitting}} = \text{Tampering ROA Paying Users} * T_{\text{annual quit rate}}$   
 $\text{TakeBacks} = 0 + (\text{STEP}(5e+007, 2010.5)) * 0$  [\*0 means policy not active at baseline]  
 $\text{Tampering ROA Paying Users} = \text{INTEG}((\text{transition to T} - T_{\text{all cause mortality}} - T_{\text{quitting}} - \text{transition to H}), T_{\text{init}})$   
 $\text{time to full effect} = 6$   
 $\text{tot initiating} = \text{initiating via friends} + \text{people initiating on their own}$   
 $\text{total desired free POA} = \text{"desired POA by free users (no UD)} + \text{desired POA by free users with UD}$   
 $\text{total opioid ODs} = \text{Free UD ODs} + \text{OU ODs} + \text{rec user ODs} + T_{\text{ODs}}$   
 $\text{TR Opioid fract over time} = 0 + \text{RAMP}(\text{full effect} / \text{time to full effect}, \text{start date}, \text{start date} + \text{time to full effect}) * 0$  [\*0 means TR policy is not active for baseline]  
 $\text{Trafficked Pharm Opioid Supply over time} = 3.5 - \text{RAMP}(0.27, 1995, 2006) - \text{RAMP}(0.05, 2006, 2010)$  [external input from a separate study by the authors]  
 $\text{transition to H} = \text{Tampering ROA Paying Users} * \text{base annual fraction T trans to H} * \text{Supply factor} * (1 / (1 - \text{TR Opioid fract over time}))$   
 $\text{transition to paid use} = (\text{Free Users With Use Disorder} / \text{base time to start paying}) * \text{impact of personal scarcity on transition to paid use}$   
 $\text{transition to T} = \text{Oral ROA Paying Users} * \text{base annual fraction OU transitioning to T} * (1 - \text{TR Opioid fract over time})$   
 $\text{"typical leftover \%"} = 0.34 * \text{drug return policy}$  [imputed from Tufts Healthcare Inst. Program on Opioid Risk Mgmt 2010]  
 $\text{typical scripted amt} = 45 * \text{hydrocodone reschedule} * \text{prescription series}$  [two potential policies not used in present study]  
 $\text{typical scripts per yr} = 1.5 * \text{hydrocodone reschedule} * \text{prescription series}$  [see above]  
 $\text{UD oral users} = \text{Free Users With Use Disorder} + \text{Oral ROA Paying Users}$   
 $\text{us pop 12 plus lagged} = \text{DELAY1I}(\text{us population 12 plus}, 1, 2.09e+008)$   
 $\text{us population 12 plus} = 2.11532e+008 * \text{EXP}(0.015 * (\text{Time} - 1995))$  [reported in NSDUH]  
 $\text{users w UD} = \text{UD oral users} + \text{Tampering ROA Paying Users}$   
 $\text{younger people added due to pop growth} = \text{ann chg in US pop 12 plus} * \text{fraction of youth perceiving little risk in opioid use.}$
